# Supplementary material
Source: Springer Nature journal article supplement (https://www.springermedizin.de/resource/supplementary/13020_2013_219_MOESM2_ESM.pdf/9641234)
Supplement: MOESM2 [file 9641234]

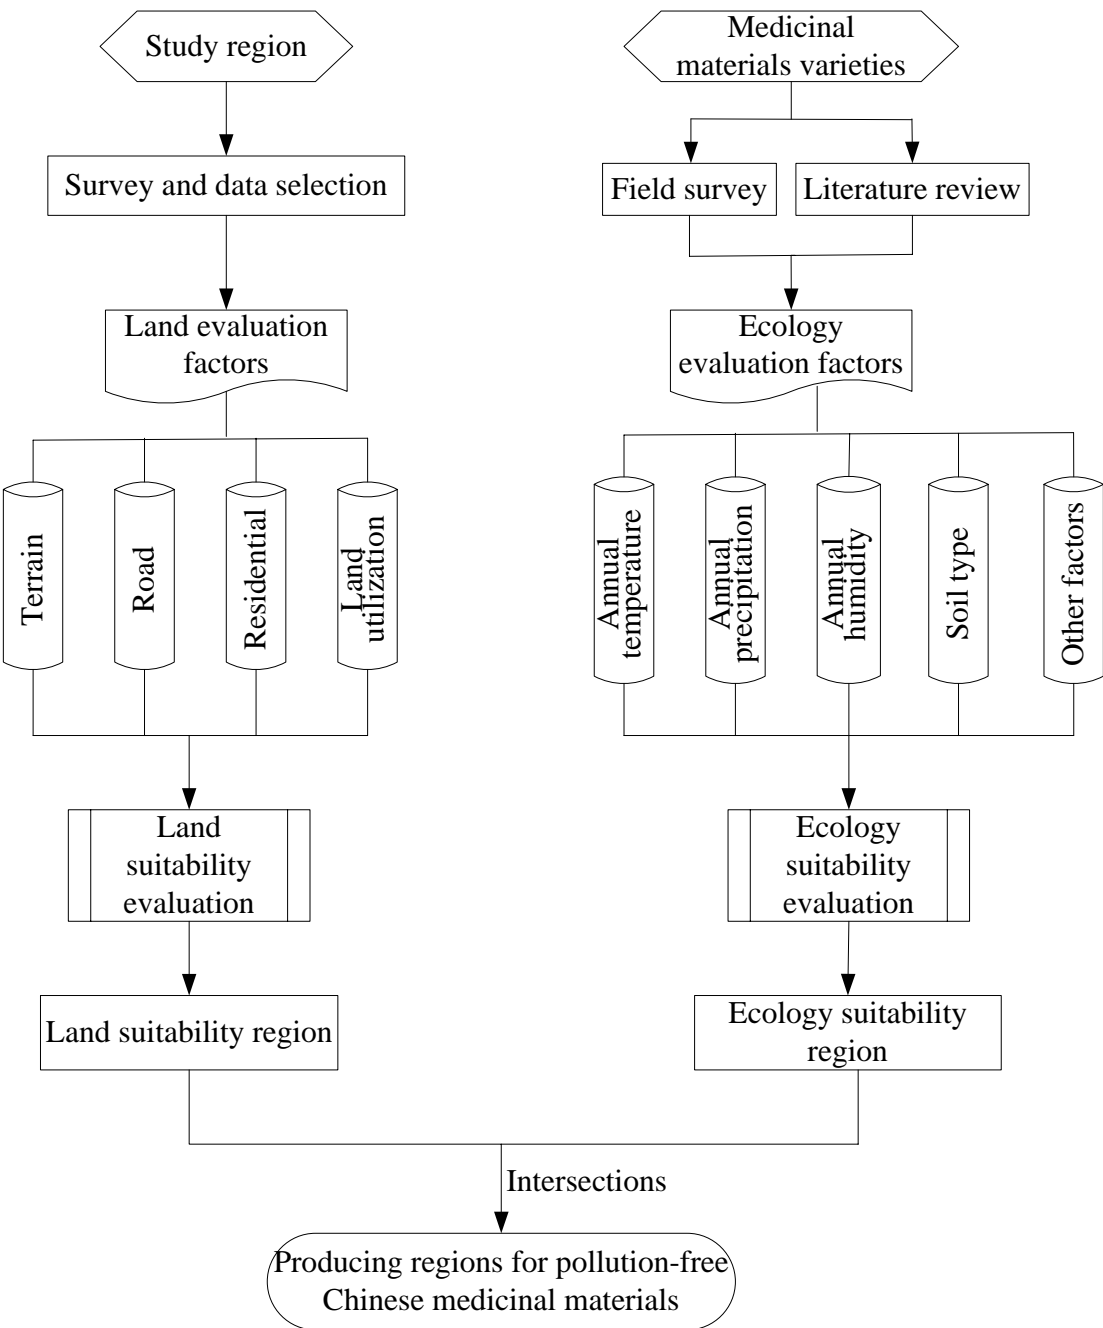

Study region

Survey and data selection

Land evaluation factors

Terrain

Road

Residential

Land utilization

Land suitability evaluation

Land suitability region

Medicinal materials varieties

Field survey

Literature review

Ecology evaluation factors

Annual temperature

Annual precipitation

Annual humidity

Soil type

Other factors

Ecology suitability evaluation

Ecology suitability region

Intersections

Producing regions for pollution-free Chinese medicinal materials
